# Supplementary material for: Controllable synthesis of an atomic Sn-anchoring carbon host for excellent long-cycle-life zinc metal batteries
Source: Royal Society of Chemistry journal article supplement (doi:10.1039/d3ta08109e), 2024-01-01
Supplement: d3ta08109e1.pdf [file d3ta08109e1.pdf]

## **Controllable Synthesis of Atomic Sn-anchored Carbon Host for Excellent Long-Cycle-Life Zinc Metal Batteries**

*Lantao Liu*<sup>a, b, c, 1</sup>, *Yiming Li*<sup>a, 1</sup>, *Hu Zhang*<sup>b</sup>, *Fang Dong*<sup>c</sup>, *Shuaize Wang*<sup>a</sup>, *Ziyu Sun*<sup>a</sup>, *Gaixia Zhang*<sup>d, \*</sup>, *Xiaohong Chen*<sup>a, \*</sup>, *Sasha Omanovic*<sup>b</sup>, *Shuhui Sun*<sup>c, \*</sup>, and *Huaihe Song*<sup>a, \*</sup>

*a* State Key Laboratory of Chemical Resource Engineering, Beijing Key Laboratory of Electrochemical Process and Technology for Materials, Beijing University of Chemical Technology, Beijing, 100029, P. R. China.

*b* Department of Chemical Engineering, McGill University, 3610 Rue University, Quebec H3A 0C5, Canada.

*c* Institut National de la Recherche Scientifique (INRS), Énergie Matériaux Télécommunications Research Centre, Québec J3X 1P7, Canada.

*d* Department of Electrical Engineering, École de Technologie Supérieure (ÉTS), Montréal, Québec H3C 1K3, Canada.

E-mail: [gaixia.zhang@etsmtl.ca](mailto:gaixia.zhang@etsmtl.ca), [chenxh@mail.buct.edu.cn](mailto:chenxh@mail.buct.edu.cn), [shuhui.sun@inrs.ca](mailto:shuhui.sun@inrs.ca),  
[songhh@mail.buct.edu.cn](mailto:songhh@mail.buct.edu.cn).

## Author Contributions

The manuscript was written through contributions of all authors. All authors have given approval to the final version of the manuscript.

## Notes

The authors declare no competing financial interest.

## Acknowledgements

This work was supported by the National Natural Science Foundation of China (51972014).

## Experimental Section

**Synthesis of HMCS:** 50 mg F-127 (average Mn-13000, Macklin) was dissolved in 60 ml deionized water and then stirred for 20 min. Subsequently, 0.38 mL aniline (AR, 99.5 %, Aladdin) and 0.29 ml pyrrole (99 %, Aladdin) were added to the mixed solution and stirred for 30 min (A). Then, 1.917 g ammonium persulfate (APS) (99.99%, Aladdin) was dissolved in 5 ml deionized water and then stirred for 15 min (B). Next, let A and B stand still for 1 h at 5 °C in incubator to initiate the polymerization of the precursor. Then mixed them quickly with magnetic stirring for 40 s. The mixed solution was put in incubator under 5 °C for 24 h. The product was repeated washed with ethanol and water by suction filtration, and then put it in vacuum oven at 80 °C for 24 h. Finally, put the product to a tube furnace and heated to 700 °C with a heating rate of 5 °C min<sup>-1</sup> under N<sub>2</sub> atmosphere and kept for 2 h to obtain the HMCS.

**Synthesis of Sn@HMCS:** 70 mg F-127 (average Mn-13000, Macklin) was dissolved in 60 ml deionized water and then stirred for 20 min. Subsequently, 0.49 mL aniline (AR, 99.5 %, Aladdin) and 0.38 ml pyrrole (99 %, Aladdin) were added to the mixed solution and stirred for 30 min (A). Then, 2.47 g ammonium persulfate (APS) (99.99%, Aladdin) was dissolved in 5 ml deionized water and then stirred for 15 min (B). Then,

0.9 g  $\text{SnCl}_2$  and 0.3g thiourea (99.99%, Aladdin) was dissolved in 30 ml deionized water and then stirred for 30 min (C). Next, take 4ml of C and add it to A and stir for 20 min (D). Finally, let D and B stand still for 50 min at 0 °C in incubator to initiate the polymerization of the precursor. Then mixed them quickly with magnetic stirring for 1 min. The mixed solution was put in incubator under 0 °C for 24 h. The product was repeated washed with ethanol and water by suction filtration, and then put it in vacuum oven at 80 °C for 24 h. Finally, put the product in a tube furnace and heated to 700 °C with a heating rate of 5 °C  $\text{min}^{-1}$  under  $\text{N}_2$  atmosphere and kept for 3 h to obtain the Sn@HMCS.

**Preparation of  $\text{MnO}_2$ :** Prepare 0.1 M aqueous solution of  $\text{KMnO}_4$  and 0.6 M aqueous solution of  $\text{MnSO}_4 \cdot \text{H}_2\text{O}$ , take 15 mL of each, add the latter to the aqueous solution of the former, and stir for 30 min. Transfer the solution to a hydrothermal kettle and hold it for 12 hours (160 °C). The supernatant was removed first, and then the brown solid at the bottom was divided into two homogeneous parts and transferred into two 50 mL centrifugal tubes for centrifugation for 5 min. The brown homogenate was cleaned several times and dried in a vacuum oven (80 degrees, 12 hours) to finally get pure  $\text{MnO}_2$ .

**Characterization:** The morphology and microstructure were studied by scanning electron microscopy (ZEISS SUPRATM) and transmission electron microscopy (Hitachi 7700). The composition information was tested by Thermogravimetric (NETZSCH), and X-ray photoelectron spectra (ESCALAB250 electron spectrometer). The crystal structure was studied by X-ray diffraction (Rigaku D), and Raman spectroscopy (Aramis, Jobin Yvon). The surface structure was tested using  $\text{N}_2$  adsorption-desorption (Micromeritics ASAP 2020).

**Calculation details:** The calculation details refer to our previous work for details.<sup>1</sup>

**Electrochemical measurements:** The Sn@HMCS and sodium alginate (SA) (AR, 90 %, Macklin) were mixed in deionized water with mass ratio of 90:10, and then coated on Cu foil. After drying at 120 °C for 12 h, Sn@HMCS electrode was obtained. The HMCS electrode was prepared in the same way. The  $\text{MnO}_2$  electrode was prepared by mixing  $\text{MnO}_2$ , Acetylene black, and polyvinylidene difluoride (PVDF) with mass

ratio of 7:2:1 in N-Methyl pyrrolidone (NMP) and coated on Stainless steel mesh.

All the zinc metal cells are constructed in a coin-type cell (CR2032). The half cells are constructed with Zn plate as anode and Sn@HMCS as cathode. 2 M ZnSO<sub>4</sub> and 0.5 M NaSO<sub>4</sub> are used as electrolyte. The active material mass of the electrode sheet used in the half battery is 0.8-1.2 mg. The pre-Zn deposition Sn@HMCS acts as the anode and cathode of symmetrical cells. The electrolyte of symmetrical cells is the same as that of half cells. The specific deposition process is as follows: Zinc is deposited on the anode of Sn@HMCS with a deposition surface capacity of 8 mAh cm<sup>-2</sup> by the method of constant current deposition (1 mA cm<sup>-2</sup>). The electrolyte of the Zn-MnO<sub>2</sub> full cell is 2 M ZnSO<sub>4</sub> and 0.1 M MnSO<sub>4</sub>, the anode is same as the symmetrical cell anode. The load of MnO<sub>2</sub> in the full cell is 1.5-3 mg. The capacity of pre-deposited zinc is 6.28 mAh. The anode/cathode capacity ratio is 6.79.

The galvanostatic charge-discharge (GCD) and cyclic voltammetry (CV) were studied on CHI 760 E electrochemical workstation (Shanghai Chenhua) and CT2001A test instrument (Wuhan LAND), respectively. The electrochemical impedance spectroscopy (EIS) tests were tested on electrochemical workstation in the frequency range of 0.01 – 100000 Hz with an amplitude of 1.2 V. For the half cells tests, the voltage window was 0.01 – 0.2 V. And the voltage window of full cells was 0.8 – 1.8 V.

The energy density ( $E$ , Wh kg<sup>-1</sup>) and power density ( $P$ , W kg<sup>-1</sup>) of full cells were calculated by the following equations based on the active material mass of cathodes:

$$E = C * V$$

$$P = \frac{E}{t}$$

where C, V, t represents the specific discharge capacity, average discharge voltage, time for discharge, respectively.

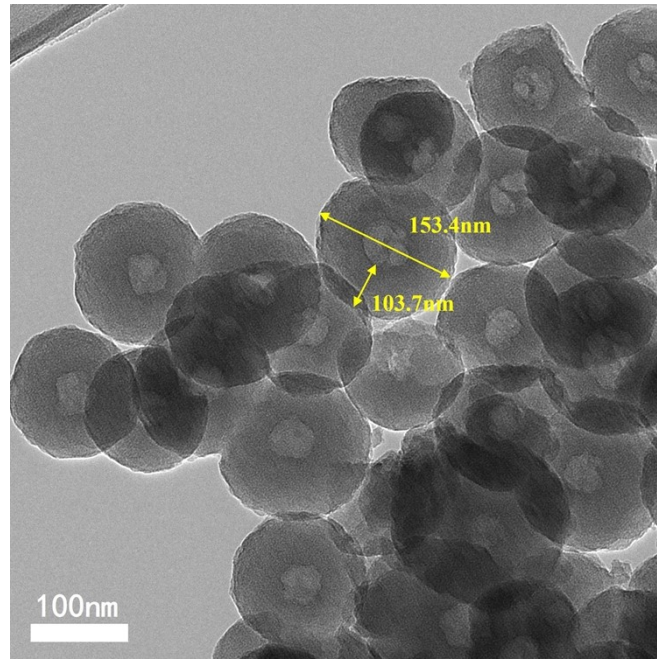

**Figure S1.** TEM image of HMCS.

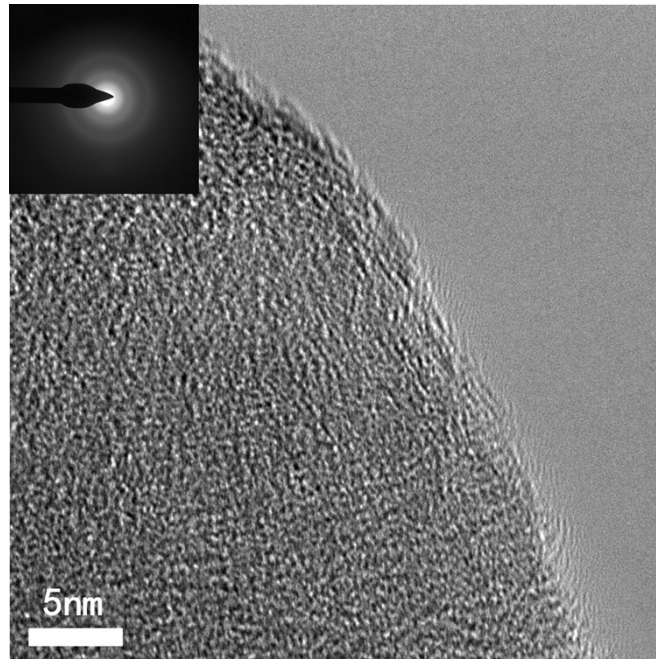

**Figure S2.** HRTEM image of HMCS (the inset is SAED patterns).

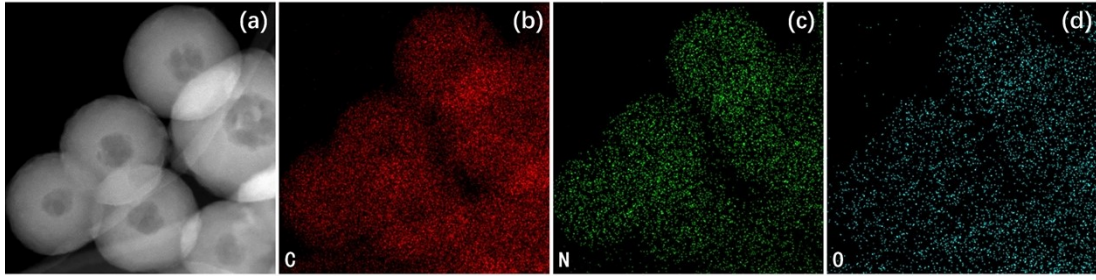

**Figure S3.** (a-d) HAADF analysis and mapping of HMCS.

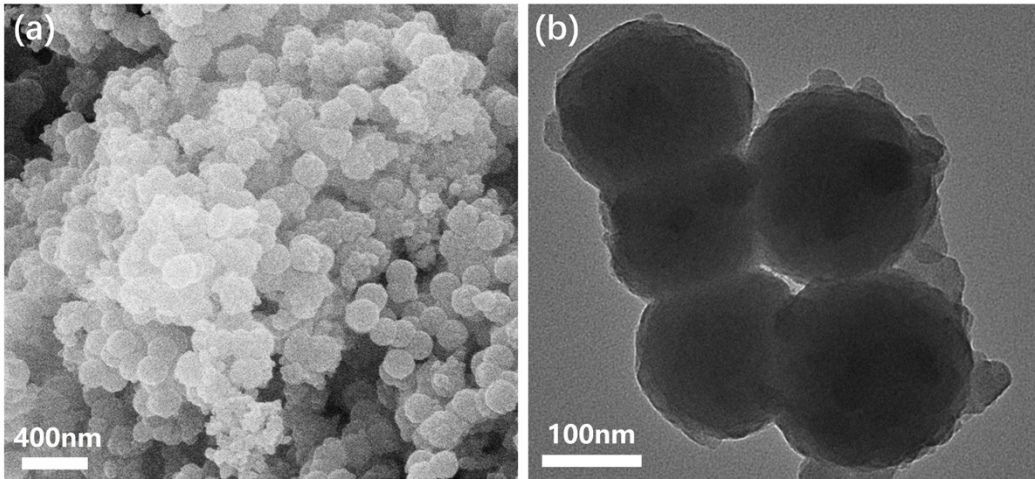

**Figure S4.** (a) SEM image of Ex-Sn@HMCS, (b) TEM image of Ex-Sn@HMCS.



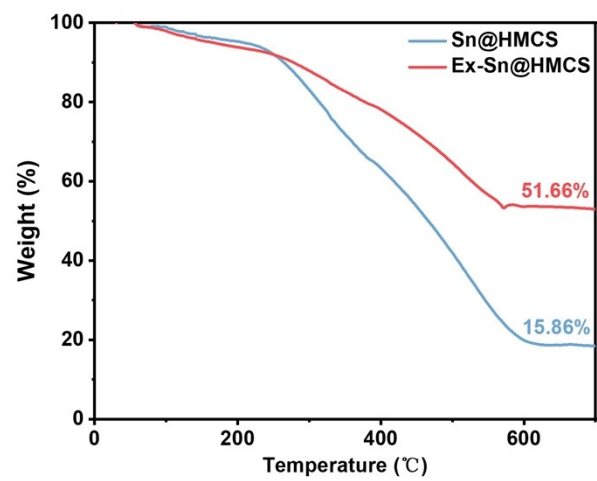

**Figure S5.** TG curves for Sn content measurement in Air.

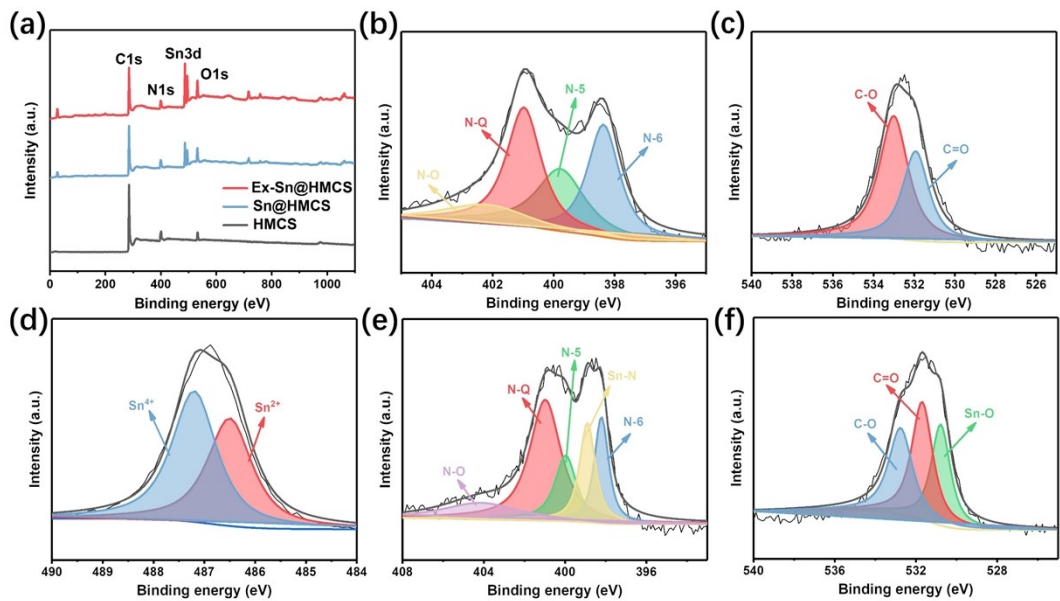

**Figure S6.** (a) XPS survey spectrum, (b) High-resolution XPS N1s spectra of HMCS, (c) High-resolution XPS O1s spectra of HMCS, (d) High-resolution XPS Sn 3d spectra of Sn@HMCS, (e) High-resolution XPS N1s spectra of Sn@HMCS, and (f) High-resolution XPS O1s spectra of Sn@HMCS.

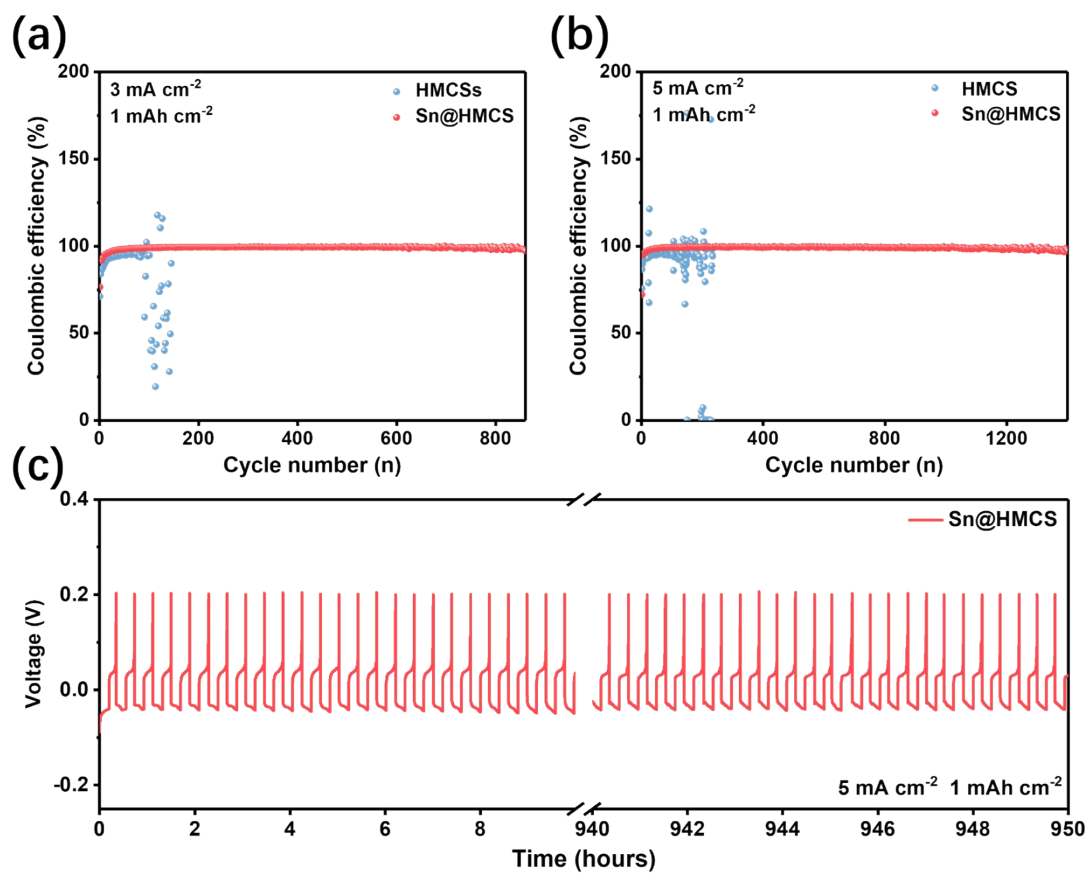

**Figure S7.** (a) Coulombic efficiencies at  $3 \text{ mA cm}^{-2}$  for  $1 \text{ mAh cm}^{-2}$ , (b) Coulombic efficiencies at  $5 \text{ mA cm}^{-2}$  for  $1 \text{ mAh cm}^{-2}$ , and (c) The voltage time curve at  $5 \text{ mA cm}^{-2}$  for  $1 \text{ mAh cm}^{-2}$ .

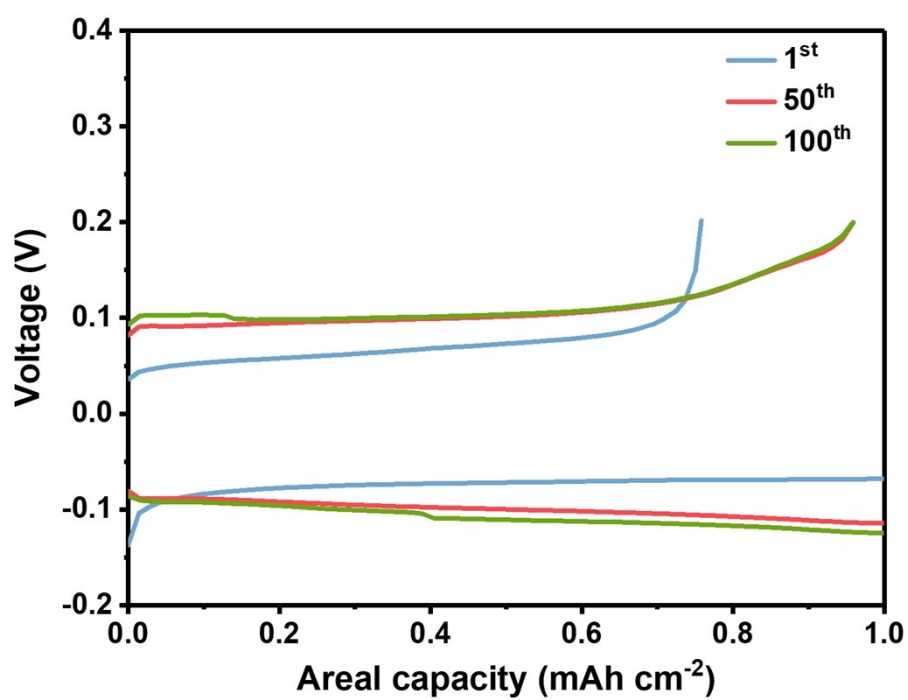

Figure S8. Voltage-Areal capacity curves of HMCS at 5 mA cm<sup>-2</sup> for 1 mAh cm<sup>-2</sup>.

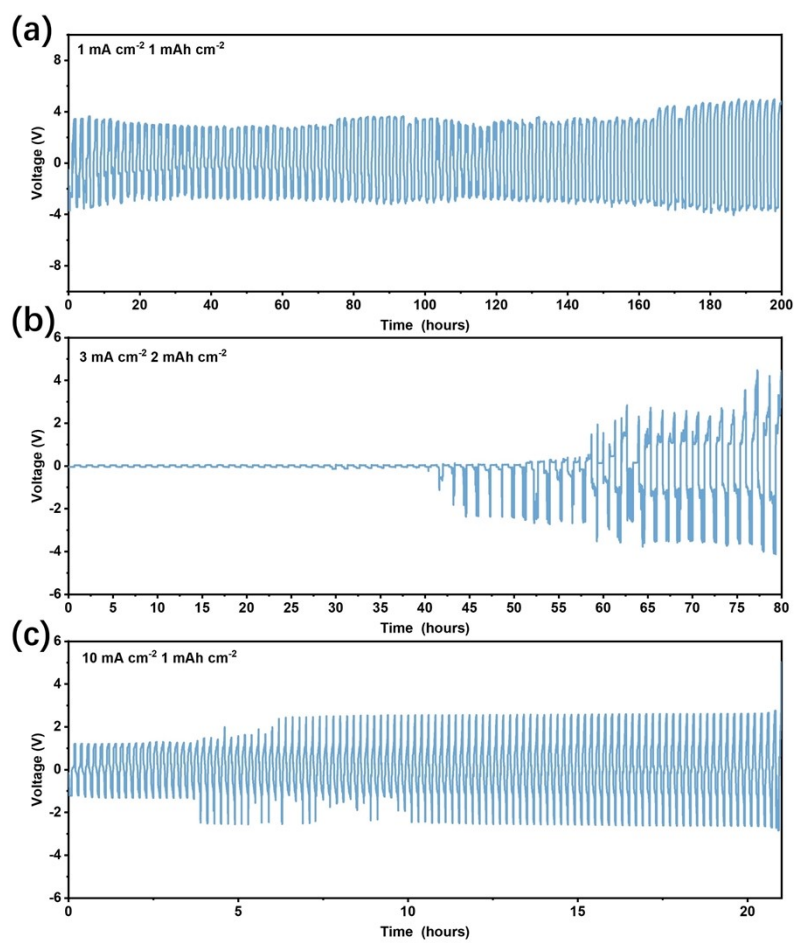

**Figure S9.** Voltage-time profiles of HMCS in symmetric cell at (a) 1 mA cm<sup>-2</sup> for 1 mAh cm<sup>-2</sup>, (b) 3 mA cm<sup>-2</sup> for 2 mAh cm<sup>-2</sup> and (c) 10 mA cm<sup>-2</sup> for 1 mAh cm<sup>-2</sup>.

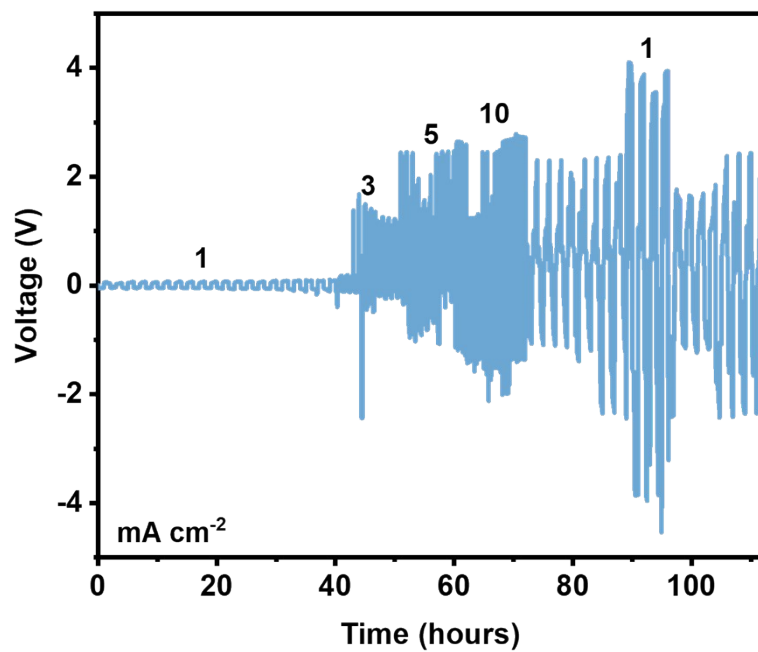

Figure S10. The rate performance of HMCS in symmetric cell.

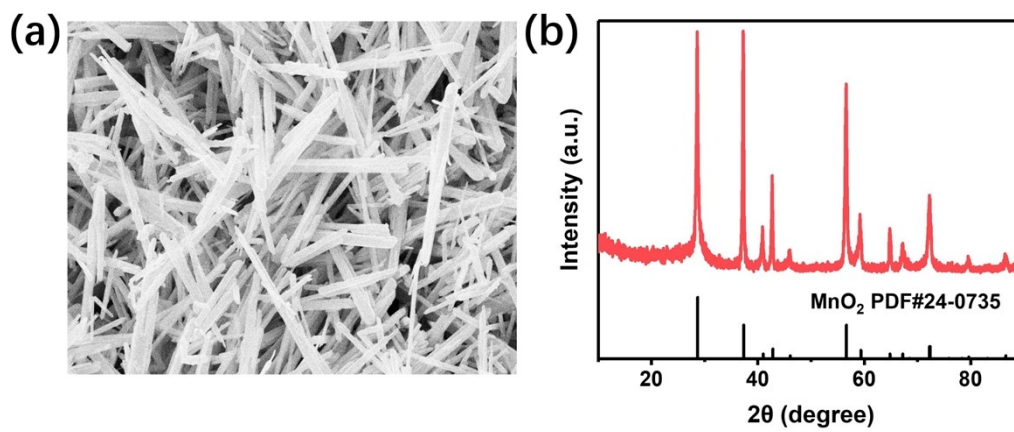

**Figure S11.** Characterization of synthetic manganese dioxide: (a) SEM image, (b) XRD pattern.

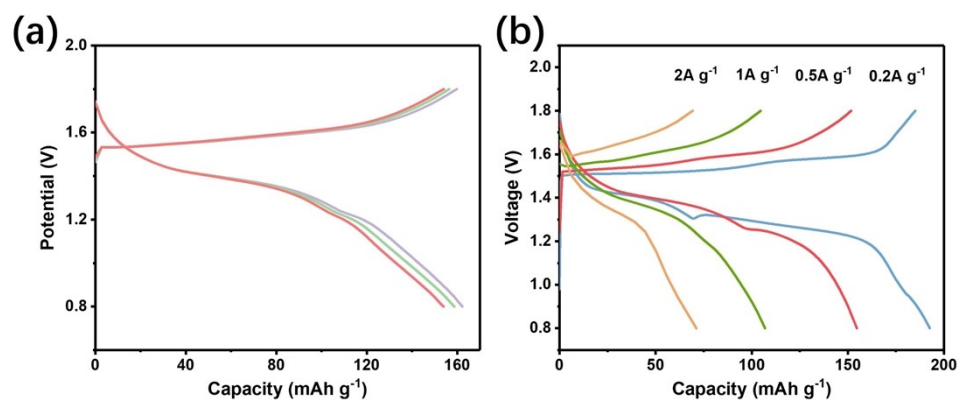

**Figure S12.** Electrochemical performance of Sn@HMCS in full cell: (a) GCD curves, (b) Capacity-voltage curves.



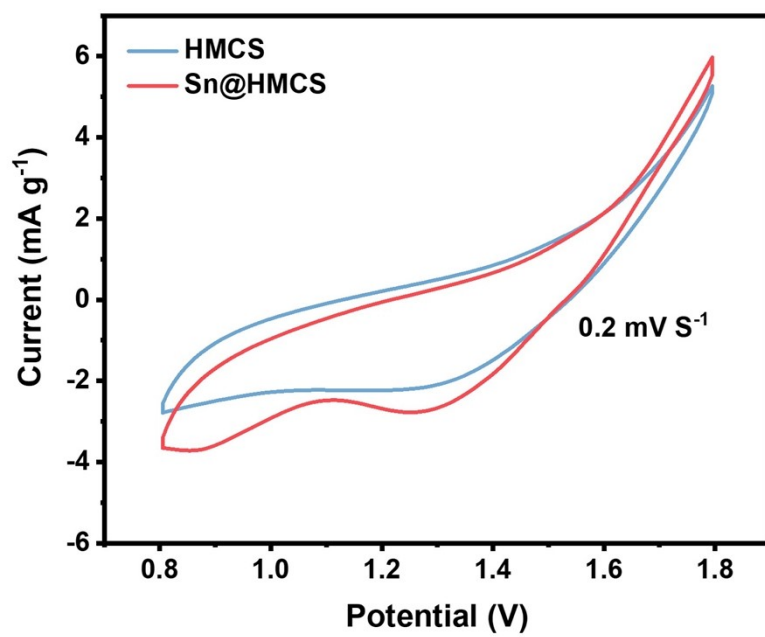

Figure S13. CV curves of Sn@HMCS and HMCS.

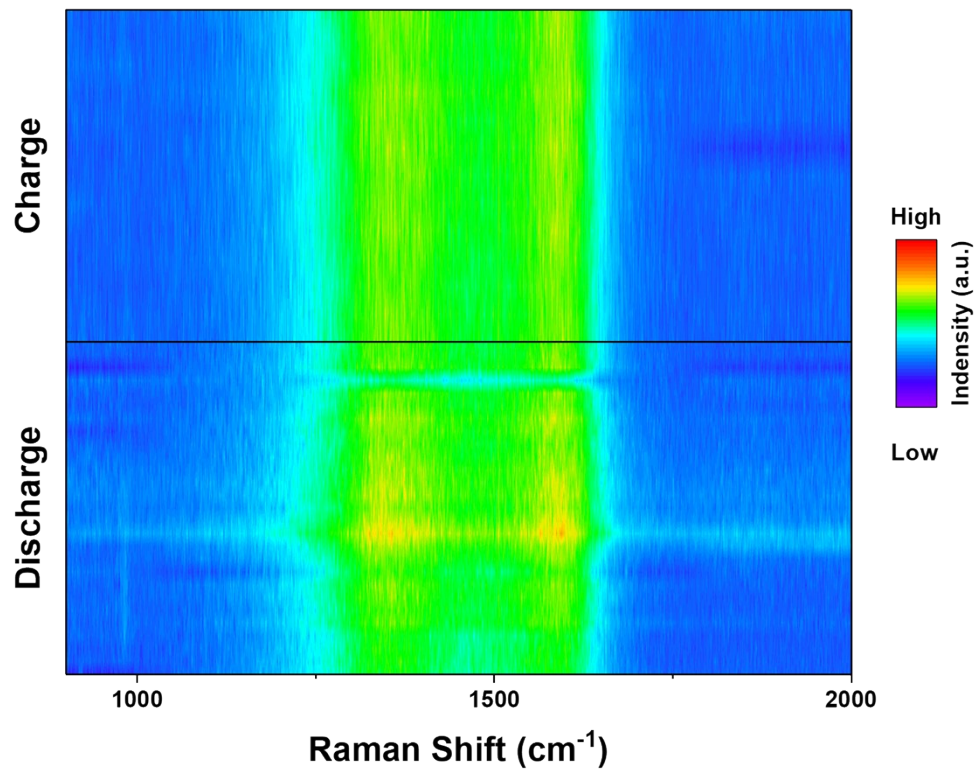

Figure S14. In situ Raman spectra of Sn@HMCS at 1A g<sup>-1</sup> deposited for 2 hours.

## Supporting Tables

**Table S1. The contents of C, O, N and Sn in obtained samples (Average of two tests)**

| Sample   | C at.% | O at.% | N at.% | Sn at.% |
|----------|--------|--------|--------|---------|
| NMCSs    | 83.03  | 11.35  | 5.56   | 0       |
| Sn-NMCSs | 76.2   | 12.21  | 10.12  | 1.47    |

**Table S2. Symmetrical cell performance comparison**

|                                                          | Current density<br>(mA cm <sup>-2</sup> ) | Area capacity<br>(mAh cm <sup>-2</sup> ) | Cycle life<br>(h) |
|----------------------------------------------------------|-------------------------------------------|------------------------------------------|-------------------|
| This Work                                                | 1                                         | 1                                        | 2400              |
|                                                          | 3                                         | 2                                        | 1120              |
|                                                          | 10                                        | 1                                        | 300               |
| Flower-shaped carbon <sup>2</sup>                        | 1                                         | 1                                        | 250               |
|                                                          | 10                                        | 1                                        | 500               |
| Metal-organic<br>frameworks-Zn <sup>3</sup>              | 1                                         | 1                                        | 1100              |
|                                                          | 5                                         | 5                                        | 400               |
|                                                          | 10                                        | 1                                        | 180               |
| Zn@Carbon nanotube <sup>4</sup>                          | 1                                         | 1                                        | 600               |
|                                                          | 2                                         | 1                                        | 1050              |
| Anchored-BaTiO <sub>3</sub> -<br>separator <sup>5</sup>  | 0.5                                       | 0.25                                     | 2000              |
|                                                          | 2                                         | 1                                        | 1050              |
|                                                          | 5                                         | 2.5                                      | 150               |
| Graphene carpet <sup>6</sup>                             | 0.5                                       | 0.25                                     | 500               |
|                                                          | 2                                         | 1                                        | 500               |
| Polarized ferroelectric<br>polymer material <sup>7</sup> | 1.8                                       | 0.45                                     | 100               |
|                                                          | 4.4                                       | 1.1                                      | 1200              |
| BaTiO <sub>3</sub> -coated Zn<br>layer <sup>8</sup>      | 0.4                                       | 0.2                                      | 1600              |
|                                                          | 1                                         | 0.5                                      | 400               |

**Table S3. Full cell performance comparison**

| Reference                                           | Current density<br>(A g <sup>-1</sup> ) | Cycle life<br>(h) |
|-----------------------------------------------------|-----------------------------------------|-------------------|
| <b>This Work</b>                                    | <b>1</b>                                | <b>900</b>        |
| Flower-shaped carbon <sup>2</sup>                   | 5                                       | 250               |
| BaTiO <sub>3</sub> -coated Zn<br>layer <sup>8</sup> | 2                                       | 300               |
| Cerium-based<br>Conversion Film <sup>9</sup>        | 0.5                                     | 400               |
| Uniform-Porous Kaolin<br>Layer <sup>10</sup>        | 0.5                                     | 600               |
| Tetramethylammonium<br>Chloride layer <sup>11</sup> | 0.02                                    | 200               |
| Zn-modified H-form<br>Zeolite <sup>12</sup>         | 1                                       | 800               |
| Polypyrrole coating <sup>13</sup>                   | 1                                       | 200               |

## References

1. Liu, L.; Lu, Y.; Wang, S.; Ding, Y.; Chen, Y.; Qiu, D.; Wang, D.; Niu, J.; Zhang, J.; Chen, X.; Song, H., B, N Stabilization Effect on Multicavity Carbon Microspheres for Boosting Durable and Fast Potassium-Ion Storage. *Journal of Colloid and Interface Science* **2022**, *620* (15), 24-34.
2. Xu, Z.; Jin, S.; Zhang, N.; Deng, W.; Seo, M. H.; Wang, X., Efficient Zn Metal Anode Enabled by O,N-Codoped Carbon Microflowers. *Nano Lett* **2022**, *22* (3), 1350-1357.
3. Zhao, C.; Du, Y.; Guo, Z.; Chen, A.; Liu, N.; Lu, X.; Fan, L.; Zhang, Y.; Zhang, N., Missing-linker bifunctional MIL-125(Ti)-Zn interface modulation layer to simultaneously suppress hydrogen evolution reaction and dendrites for Zn metal anodes. *Energy Storage Materials* **2022**, *53*, 322-330.
4. Dong, L.; Yang, W.; Yang, W.; Tian, H.; Huang, Y.; Wang, X.; Xu, C.; Wang, C.; Kang, F.; Wang, G., Flexible and conductive scaffold-stabilized zinc metal anodes for ultralong-life zinc-ion batteries and zinc-ion hybrid capacitors. *Chemical Engineering Journal* **2020**, *384*.
5. Liang, Y.; Ma, D.; Zhao, N.; Wang, Y.; Yang, M.; Ruan, J.; Yang, G.; Mi, H.; He, C.; Zhang, P., Novel Concept of Separator Design: Efficient Ions Transport Modulator Enabled by Dual-Interface Engineering Toward Ultra-Stable Zn Metal Anodes. *Advanced Functional Materials* **2022**, *32* (25).
6. Li, C.; Sun, Z.; Yang, T.; Yu, L.; Wei, N.; Tian, Z.; Cai, J.; Lv, J.; Shao, Y.; Rummeli, M. H.; Sun, J.; Liu, Z., Directly Grown Vertical Graphene Carpets as Janus Separators toward Stabilized Zn Metal Anodes. *Adv Mater* **2020**, *32* (33), e2003425.

7. Wang, Y.; Guo, T.; Yin, J.; Tian, Z.; Ma, Y.; Liu, Z.; Zhu, Y.; Alshareef, H. N., Controlled Deposition of Zinc-Metal Anodes via Selectively Polarized Ferroelectric Polymers. *Adv Mater* **2022**, *34* (4), e2106937.
8. Wu, K.; Yi, J.; Liu, X.; Sun, Y.; Cui, J.; Xie, Y.; Liu, Y.; Xia, Y.; Zhang, J., Regulating Zn Deposition via an Artificial Solid-Electrolyte Interface with Aligned Dipoles for Long Life Zn Anode. *Nanomicro Lett* **2021**, *13* (1), 79.
9. Deng, C.; Xie, X.; Han, J.; Lu, B.; Liang, S.; Zhou, J., Stabilization of Zn Metal Anode through Surface Reconstruction of a Cerium-Based Conversion Film. *Advanced Functional Materials* **2021**, *31* (51).
10. Deng, C.; Xie, X.; Han, J.; Tang, Y.; Gao, J.; Liu, C.; Shi, X.; Zhou, J.; Liang, S., A Sieve-Functional and Uniform-Porous Kaolin Layer toward Stable Zinc Metal Anode. *Advanced Functional Materials* **2020**, *30* (21).
11. Xu, Y.; Zheng, X.; Sun, J.; Wang, W.; Wang, M.; Yuan, Y.; Chuai, M.; Chen, N.; Hu, H.; Chen, W., Nucleophilic Interfacial Layer Enables Stable Zn Anodes for Aqueous Zn Batteries. *Nano Lett* **2022**, *22* (8), 3298-3306.
12. Lin, X.-S.; Sun, J.-R.; Ge, L.-H.; Xu, J.-W.; Liu, W.-L.; Ren, M.-M.; Kong, F.-G.; Wang, S.-J.; Zhang, C.-B., Zn-modified zeolites host for dendrite-free zinc metal anodes. *Journal of Sol-Gel Science and Technology* **2022**, *103* (2), 386-395.
13. Zhang, F.; Wang, C.; Pan, J.; Tian, F.; Zeng, S.; Yang, J.; Qian, Y., Polypyrrole-controlled plating/stripping for advanced zinc metal anodes. *Materials Today Energy* **2020**, *17*.
